# Supplementary material for: An Exploratory Data Analysis on Certified Perovskite Devices Efficiency and I-V Metrics: Insights into Materials Engineering and Process Scaling Up<strong> </strong>
Source: Preprints.org preprint supplement (doi:10.20944/preprints202006.0110.v1), 2020-06-07
Supplement: Supplementary file 1 [file supplementary]

## Sheet: certified perovskite summary - 
Paper #	Device #	DOI	Manuscripted submitted year	Manuscript submitted date	Manufacturer	Country	Efficiency (%)	Voc (V)	Voc per cell (V)	Isc (mA)	Jsc (mA/cm^2)	FF (%)	Pmax (mW)	Vmax (V)	Imax (mA)	Apeture area (cm^2)	Device size type	Sweep direction	Sweep rate mV/s	Certified agency	Certified year	Transparent conductive oxide type	Electron transport layer type	Perovskite composition	Perovskite chemistry type	Perovksite depostion method	Hole transport layer type	Conductive electrode layer	Device structure
1	1	10.1038/s41560-018-0200-6	2018	28Jan2018	Korean Research Institute of Chemical Technology	South Korea	22.6	1.1268	1.1268	2.3405	24.9255	80.5	2.122	0.971	2.184	0.0939	sub cell (~0.1 cm^2)	reverse	150	Newport Corporation	2017	FTO	c-TiO2/mp-TiO2	(FAPbI3)0.95(MAPbBr3)0.05	(FA,MA)Pb(I,Br)3	spin coating	Spiro-OMeTAD	Au	mesoscopic
1	2	10.1038/s41560-018-0200-6	2018	28Jan2018	Korean Research Institute of Chemical Technology	South Korea	20.87	1.125	1.125	24.7	24.9243	74.5	20.68	0.904	22.86	0.991	cell ( ~1 cm^2)	reverse	150	Newport Corporation	2017	FTO	c-TiO2/mp-TiO2	(FAPbI3)0.95(MAPbBr3)0.05	(FA,MA)Pb(I,Br)3	spin coating	Spiro-OMeTAD	Au	mesoscopic
2	1	10.1039/c6ee02693a	2016	15Sep2016	Nanyang Technological University	Singapore	9.11	3.766	0.9415	162.452	20.4894	47.2	288.99	2.3771	121.574	31.7144	submodule ( >10 cm^2)	reverse	NA	Newport Corporation	2016	FTO	c-TiO2/mp-TiO2	MAPbI3	MAPbI3	screen printing	No HTL	Carbon paste	HTL free
3	1	10.1002/adma.201806823	2018	22Oct2018	Panasonic Corporation	Japan	20.275	1.112	1.112	23.895	23.9669	76.1	20.22	0.9285	21.78	0.997	cell ( ~1 cm^2)	average	NA	National Institute of Advanced Industrial Science and Technology (AIST)	2018	ITO	c-TiO2/mp-TiO2	Cs0.05(MA0.17FA0.83)0.95Pb(I0.83Br0.17)3	(FA,MA,Cs)Pb(I,Br)3	spin coating	PTAA	Au	mesoscopic
3	2	10.1002/adma.201806823	2018	22Oct2018	Panasonic Corporation	Japan	20.435	1.1125	1.1125	23.87	23.9418	76.8	20.38	0.9285	21.95	0.997	cell ( ~1 cm^2)	average	NA	National Institute of Advanced Industrial Science and Technology (AIST)	2018	ITO	c-TiO2/mp-TiO2	Cs0.05(MA0.17FA0.83)0.95Pb(I0.83Br0.17)3	(FA,MA,Cs)Pb(I,Br)3	spin coating	PTAA	Au	mesoscopic
4	1	10.1002/adfm.201807604	2018	28Oct2018	Southern University of Science and Technology	China	17.27	1.062	1.062	0.878	21.7004	74.9	0.699	0.92	0.76	0.04046	sub cell (~0.1 cm^2)	NA	NA	National institute of metrology, China	2018	ITO	SnO2	Cs0.05FA0.81MA0.14PbI2.55Br0.45	(FA,MA,Cs)Pb(I,Br)3	spin coating	Spiro-OMeTAD	Au	planar
5	1	10.1126/science.aaa9272	2015	15Feb2015	Korean Research Institute of Chemical Technology	South Korea	20.11	1.059	1.059	2.354	24.6492	77	1.92	0.894	2.148	0.0955	sub cell (~0.1 cm^2)	average	NA	Newport Corporation	2014	FTO	c-TiO2/mp-TiO2	(FAPbI3)0.95(MAPbBr3)0.05	(FA,MA)Pb(I,Br)3	spin coating	PTAA	Au	mesoscopic
6	1	10.1039/C9EE00453J	2019	08Feb2019	École polytechnique fédérale de Lausanne	Switzerland	21.37	1.093	1.093	2.185	24.4955	79.8	1.906	0.937	2.035	0.0892	sub cell (~0.1 cm^2)	average	100	Newport Corporation	2018	FTO	c-TiO2/SnO2	(FAPbI3)0.85(MAPbBr3)0.15	(FA,MA)Pb(I,Br)3	spin coating	Spiro-OMeTAD	Au	mesoscopic
7	1	10.1038/s41586-019-1036-3	2018	04Jun2018	Korean Research Institute of Chemical Technology	South Korea	22.67	1.1442	1.1442	2.33	24.9198	79.6	2.12	0.982	2.158	0.0935	sub cell (~0.1 cm^2)	average	150	Newport Corporation	2017	FTO	c-TiO2/mp-TiO2	(FAPbI3)0.95(MAPbBr3)0.05/n-hexyl trimethylammonium bromide	(FA,MA)Pb(I,Br)3	spin coating	polythiophene	Au	mesoscopic
8	1	10.1002/aenm.201803258	2018	20Oct2018	Commonwealth Scientific and Industrial Research Organisation (CSIRO)	Australia	14.33	1.1892	1.1892	1.314	16.6942	72.2	1.128	NA	NA	0.07871	sub cell (~0.1 cm^2)	average	20	Commonwealth Scientific and Industrial Research Organisation PV performance lab	2018	ITO	PEDOT:PSS	(BA)2(MA)3Pb4I13	2D	drop casting	C60	Ag	inverted planar
9	1	10.1039/C9TA01070J	2019	28Jan2019	Beijing Institute of Technology	China	20.2	1.11	1.11	2.23	23.7032	77	1.9	0.93	2.045	0.09408	sub cell (~0.1 cm^2)	average	33	National institute of metrology, China	2018	ITO	SnO2	Cs0.05FA0.81MA0.14PbI2.55Br0.45	(FA,MA,Cs)Pb(I,Br)3	spin coating	Spiro-OMeTAD	Au	planar
10	1	10.1002/adma.201900390	2019	17Jan2019	Peking University	China	20.5	1.105	1.105	2.255	23.969	77.2	1.925	0.93	2.075	0.09408	sub cell (~0.1 cm^2)	average	33	National institute of metrology, China	2018	ITO	SnO2	(FA0.57MA0.43PbI2.87Br0.13 (Cl))	(FA,MA)Pb(I,Br)3	spin coating	Spiro-OMeTAD	Au	planar
11	1	10.1038/s41560-018-0324-8	2017	26Mar2017	North China Electric Power University	China	20.5	1.11	1.11	1.74	25.13	73.5	1.42	0.89	1.59	0.06924	sub cell (~0.1 cm^2)	reverse	NA	National institute of metrology, China	2017	FTO	c-TiO2	n-type MAPbI3/p-type MAPbI3	MAPbI3	spin coating	Spiro-OMeTAD	Au	planar
12	1	10.1126/science.aau5701	2018	24Jun2018	Peking University	China	20.515	1.14	1.14	2.18	23.1718	77.6	1.93	0.96	2.01	0.09408	sub cell (~0.1 cm^2)	average	33	National institute of metrology, China	2018	ITO	SnO2	(FA,MA,Cs)Pb(I,Br)3(Cl)/Eu(acac)3	(FA,MA,Cs)Pb(I,Br)3	spin coating	Spiro-OMeTAD	Au	planar
13	1	10.1038/s41467-019-09093-1	2018	11Aug2018	Peking University	China	20.87	1.1464	1.1464	2.237	23.7726	76.7	1.965	0.964	2.038	0.0941	sub cell (~0.1 cm^2)	average	40	Newport Corporation	2018	ITO	SnO2	(FA,MA,Cs)Pb(I,Br)3/formamidine acetate	(FA,MA,Cs)Pb(I,Br)3	spin coating	Spiro-OMeTAD	Au	planar
14	1	10.1038/s41560-019-0382-6	2018	02Aug2018	Peking University	China	21.25	1.12	1.12	2.29	24.341	77.75	2.005	0.94	2.125	0.09408	sub cell (~0.1 cm^2)	average	33	National institute of metrology, China	2019	ITO	SnO2	(Cs0.05FA0.54MA0.41)Pb(I0.98Br0.02)3/NaF	(FA,MA,Cs)Pb(I,Br)3	spin coating	Spiro-OMeTAD	Au	planar
15	1	10.1038/s41598-017-08642-2	2017	25Apr2017	University of Sheffield	UK	6.59	0.847	0.847	17.9	17.7632	43.75	6.64			1.0077	cell ( ~1 cm^2)	NA	NA	Centre for Renewable Energy Systems Technology, Loughborough University	2016	FTO	c-TiO2/mp-TiO2	MAPbI3	MAPbI3	spray-coating	Spiro-OMeTAD	Au	planar
16	1	10.1038/ncomms15330	2016	01Aug2016	Shanghai JiaoTong University	China	15.57	1.074	1.074	19.68	19.2941	75.1	15.89	0.871	18.23	1.02	cell ( ~1 cm^2)	NA	NA	National Institute of Advanced Industrial Science and Technology (AIST)	2015	FTO	C60	MAPbI3	MAPbI3	spin coating	NiMgLiO	Ag	inverted planar
17	1	10.1016/j.jmst.2018.12.025	2018	25Nov2018	Xi'an Jiaotong University	China	17.83	1.0924	1.0924	2.204	22.173	73.6	1.772	0.896	1.978	0.0994	sub cell (~0.1 cm^2)	stablized	NA	Newport Corporation	2017	FTO	c-TiO2	FA0.3MA0.7PbI3	(FA,MA)PbI3	spin coating	polythiophene	Carbon paste	planar
18	1	10.1038/nmat4014	2014	24Feb2014	Korean Research Institute of Chemical Technology	South Korea	16.15	1.1085	1.1085	1.84	19.6162	74.2	1.51	0.9052	1.67	0.0938	sub cell (~0.1 cm^2)	NA	NA	Newport Corporation	2013	FTO	c-TiO2/mp-TiO2	MAPb(I1-xBrx)3(x=0.1-0.15)	MAPb(I,Br)3	spin coating	PTAA	Au	mesoscopic
19	1	10.1126/science.aad1015	2015	27Jul2015	National Institute for Materials Science, Japan	Japan	15	1.09	1.09	20.96	20.6096	66.8	15.26	0.879	17.35	1.017	cell ( ~1 cm^2)	reverse	NA	National Institute of Advanced Industrial Science and Technology (AIST)	2015	FTO	C60	MAPbI3	MAPbI3	spin coating	NiMgLiO	Ag	inverted planar
20	1	10.1126/science.1254763	2014	14Apr2014	Huazhong University of Science and Technology	China	12.84	0.8579	0.8579	1.65	22.7586	65.8	0.93	0.654	1.42	0.0725	sub cell (~0.1 cm^2)	NA	NA	Newport Corporation	2013	FTO	c-TiO2/mp-TiO2	(5-AVA)x(MA)1-xPbI3@ZrO2	MAPbI3	screen printing	No HTL	carbon black/graphite	HTL free
21	1	10.1038/nature12340	2013	03Apr2013	École polytechnique fédérale de Lausanne	Switzerland	14.14	1.0071	1.0071	4.46	21.3397	65.7	2.96	0.7763	3.81	0.209	sub cell (~0.1 cm^2)	NA	NA	Newport Corporation	2013	FTO	c-TiO2/mp-TiO2	MAPbI3	MAPbI3	spin coating	Spiro-OMeTAD	Au	mesoscopic
22	1	10.1021/jacs.5b11740	2015	09Nov2015	University of Toronto	Canada	15.29	1.0953	1.0953	0.941	18.9718	73.7	0.759	0.9156	0.829	0.0496	sub cell (~0.1 cm^2)	average	NA	Newport Corporation	2015	FTO	c-TiO2/mp-TiO2	(C6H5C2H4NH3)2(CH3NH3)n-1PbnI3n+1; n=60	2D	spin coating	Spiro-OMeTAD	Au	mesoscopic
23	1	10.1126/science.aaf8060	2016	02Apr2016	École polytechnique fédérale de Lausanne	Switzerland	19.56	1.1428	1.1428	22.601	22.5942	75.7	19.56	0.9534	20.518	1.0003	cell ( ~1 cm^2)	forward	43	Newport Corporation	2016	FTO	c-TiO2/mp-TiO2	FA0.81MA0.15PbI2.51Br0.45	(FA,MA)Pb(I,Br)3	spin coating	Spiro-OMeTAD	Au	mesoscopic
24	1	10.1039/c6ee02139e	2016	25Jul2016	Shaanxi Normal University	China	19.421	1.0994	1.0994	2.545	22.4427	78.72	2.214	0.9348	2.356	0.1134	sub cell (~0.1 cm^2)	reverse	NA	National centre of supervision & Inspection on solar photovoltaic products quality	2016	FTO	c-TiO2	MAPbI3	MAPbI3	Vacuum assisted deposition	PTAA	Au	planar
25	1	10.1038/nenergy.2016.142	2016	04May2016	École polytechnique fédérale de Lausanne	Switzerland	21.02	1.134	1.134	2.497	23.7583	78	2.208	0.9568	2.308	0.1051	sub cell (~0.1 cm^2)	NA	NA	Newport Corporation	2015	FTO	c-TiO2/mp-TiO2	(FAI)0.81(PbI2)0.85(MAPbBr3)0.15	(FA,MA)Pb(I,Br)3	spin coating	Spiro-OMeTAD	Au	mesoscopic
26	1	10.1038/NENERGY.2016.148	2016	28May2016	National Institute for Materials Science, Japan	Japan	18.21	1.081	1.081	21.95	21.4775	78.4	18.61	0.903	20.62	1.022	cell ( ~1 cm^2)	forward	NA	National Institute of Advanced Industrial Science and Technology (AIST)	2015	FTO	c-TiO2	FA0.85MA0.15Pb(I0.85,Br0.85)3	(FA,MA)Pb(I,Br)3	spin coating	NiMgLiO	Ag	inverted planar
27	1	10.1126/science.aai9081	2016	29Aug2016	University of Toronto	Canada	20.14	1.1696	1.1696	1.061	21.6973	79.4	0.985	1.0009	0.985	0.0489	sub cell (~0.1 cm^2)	reverse	10	Newport Corporation	2016	ITO	c-TiO2	Cs0.05FA0.81MA0.14PbI2.55Br0.45	(FA,MA,Cs)Pb(I,Br)3	spin coating	Spiro-OMeTAD	Au	planar
27	2	10.1126/science.aai9081	2016	29Aug2016	University of Toronto	Canada	19.46	1.1947	1.1947	23.815	21.5112	75.7	21.543	0.9785	22.016	1.1071	cell ( ~1 cm^2)	reverse	10	Newport Corporation	2016	ITO	c-TiO2	Cs0.05FA0.81MA0.14PbI2.55Br0.45	(FA,MA,Cs)Pb(I,Br)3	spin coating	Spiro-OMeTAD	Au	planar
28	1	10.1038/NENERGY.2016.177	2016	02May2016	Institute of semicondutors, Chinese Academy of Sciences	China	19.9	1.069	1.069	1.792	24.3148	76.6	1.467	0.897	1.646	0.0737	sub cell (~0.1 cm^2)	average	26	Newport Corporation	2016	ITO	SnO2	(FAPbI3)0.97(MAPbBr3)0.03	(FA,MA)Pb(I,Br)3	spin coating	Spiro-OMeTAD	Au	planar
29	1	10.1002/cssc.201601387	2016	01Oct2016	École polytechnique fédérale de Lausanne	Switzerland	18.755	1.132	1.132	3.6765	23.4471	70.65	2.9405	0.9078	3.239	0.1568	sub cell (~0.1 cm^2)	average	NA	Newport Corporation	2015	FTO	c-TiO2/mp-TiO2	(FAPbI3)0.85(MAPbBr3)0.15	(FA,MA)Pb(I,Br)3	spin coating	Spiro-OMeTAD	Au	mesoscopic
30	1	10.1002/aenm.201700444	2017	19Feb2017	Monash university	Australia	15.15	1.0103	1.0103	21.337	20.4397	73.4	0.01581	NA	NA	1.0439	cell ( ~1 cm^2)	NA	NA	Commonwealth Scientific and Industrial Research Organisation PV performance lab	2016	FTO	c-TiO2/mp-TiO2	MA0.984EDA0.008PbI3(EDA=ethane-1,2-diammonium)	(FA,MA)PbI3	spin coating	Spiro-OMeTAD	Au	mesoscopic
31	1	10.1002/adma.201701073	2017	23Feb2017	National Institute for Materials Science, Japan	Japan	19.19	1.122	1.122	23.17	22.6049	75.7	19.68	0.91	21.62	1.025	cell ( ~1 cm^2)	forward	NA	National Institute of Advanced Industrial Science and Technology (AIST)	2016	FTO	C60	MAPbI3/MAAc/thisemicabazide	MAPbI3	spin coating	NiMgLiO	Ag	inverted planar
32	1	10.1126/science.aan2301	2017	14Mar2017	Korean Research Institute of Chemical Technology	South Korea	22.13	1.1047	1.1047	2.362	24.9683	80.3	2.093	0.9586	2.183	0.0946	sub cell (~0.1 cm^2)	average	NA	Newport Corporation	2016	FTO	c-TiO2/mp-TiO2	(FAPbI3)x(MAPbBr3)1-x/I3-	(FA,MA)Pb(I,Br)3	spin coating	PTAA	Au	mesoscopic
32	2	10.1126/science.aan2301	2017	14Mar2017	Korean Research Institute of Chemical Technology	South Korea	19.69	1.1043	1.1043	24.463	24.6677	72.3	19.522	0.8772	22.254	0.9917	cell ( ~1 cm^2)	average	160	Newport Corporation	2016	FTO	c-TiO2/mp-TiO2	(FAPbI3)x(MAPbBr3)1-x/I3-	(FA,MA)Pb(I,Br)3	spin coating	PTAA	Au	mesoscopic
33	1	10.1021/acsenergylett.7b00573	2017	30Jun2017	The University of New South Wales	Australia	18.04	1.1326	1.1326	25.53	21.373	74.6	21.553	0.9285	23.215	1.1945	cell ( ~1 cm^2)	average	200	Newport Corporation	2016	FTO	c-TiO2/mp-TiO2	(FAPbI3)0.85(MAPbBr3)0.15	(FA,MA)Pb(I,Br)3	spin coating	Spiro-OMeTAD	Au	mesoscopic
33	2	10.1021/acsenergylett.7b00573	2017	30Jun2017	The University of New South Wales	Australia	12.08	1.1278	1.1278	276.735	17.3059	61.9	193.08	0.8018	240.764	15.9908	submodule ( >10 cm^2)	average	200	Newport Corporation	2016	FTO	c-TiO2/mp-TiO2	(FAPbI3)0.85(MAPbBr3)0.15	(FA,MA)Pb(I,Br)3	spin coating	Spiro-OMeTAD	Au	mesoscopic
34	1	10.1038/nature23877	2017	07Mar2017	Shanghai JiaoTong University	China	12.07	8.36	0.836	73	20.2048	71.5	436	6.59	66.1	36.13	submodule ( >10 cm^2)	forward	NA	National Institute of Advanced Industrial Science and Technology (AIST)	2016	FTO	c-TiO2/mp-TiO2	MAPbI3	MAPbI3	pressure processing	Spiro-OMeTAD	Au	mesoscopic
35	1	10.1002/adma.201703852	2017	11Jul2017	Institute of semicondutors, Chinese Academy of Sciences	China	20.91	1.1164	1.1164	1.77	24.0163	78	1.542	0.9473	1.627	0.0737	sub cell (~0.1 cm^2)	average	20	Newport Corporation	2017	ITO	SnO2	(FAPbI3)x(MAPbBr3)1-x/I3-	(FA,MA)Pb(I,Br)3	spin coating	Spiro-OMeTAD	Au	planar
36	1	10.1038/nenergy.2017.102	2016	03Oct2016	University of Nebraska Lincoln	USA	20.59	1.1313	1.1313	1.646	22.9888	79.1	1.473	0.9634	1.529	0.0716	sub cell (~0.1 cm^2)	reverse	100	Newport Corporation	2017	ITO	C60	FA0.85MA0.15Pb(I0.85,Br0.85)3/Choline chloride	(FA,MA)Pb(I,Br)3	spin coating	PTAA	Cu	planar
37	1	10.1039/C8TA01192C	2018	05Feb2018	Xi'an Jiaotong University	China	15.56	5.256	1.0512	45.58	21.6019	69	165.109	4.1795	39.505	10.55	submodule ( >10 cm^2)	average	200	Newport Corporation	2017	FTO	c-TiO2	FA0.3MA0.7PbI3	(FA,MA)PbI3	spin coating	Spiro-OMeTAD	Au	planar
38	1	10.1021/acsenergylett.8b00293	2018	19Feb2018	Fraunhofer Institute for Solar Energy Systems ISE	Germany	11.01	1.0015	1.0015	1.54	17.5799	62.33	0.96	0.7885	1.22	0.0876	sub cell (~0.1 cm^2)	stablized	NA	Fraunhofer Institute for Solar Energy Systems ISE	2017	FTO	c-TiO2/mp-TiO2	MAPbI3	MAPbI3	inflitration	No HTL	graphite	HTL free
38	2	10.1021/acsenergylett.8b00293	2018	19Feb2018	Fraunhofer Institute for Solar Energy Systems ISE	Germany	14.52	1.0019	1.0019	1.68	19.1781	75.7	1.27	0.7963	1.6	0.0876	sub cell (~0.1 cm^2)	stablized	NA	Fraunhofer Institute for Solar Energy Systems ISE	2017	FTO	c-TiO2/mp-TiO2	MAPbI3	MAPbI3	inflitration	No HTL	graphite	HTL free
39	1	10.1002/adma.201707583	2017	28Dec2017	North China Electric Power University	China	20.8	1.14	1.14	2.62	24.3336	75	2.24	0.92	2.43	0.10767	sub cell (~0.1 cm^2)	reverse	NA	National institute of metrology, China	2018	ITO	SnO2	FA0.15MA0.85PbI3/rubrene	(FA,MA)PbI3	spin coating	Spiro-OMeTAD	Au	planar
40	1	10.1021/acsaem.8b00803	2018	22May2018	Wuhan University of Technology	China	13.82	14	1	43.115	19.0353	72.635	438.2	12.05	36.37	31.71	submodule ( >10 cm^2)	average	NA	National centre of supervision & Inspection on solar photovoltaic products quality	2017	ITO	C60	MAPbI3	MAPbI3	thermal evapration/spin coating	Spiro-OMeTAD	Cu	planar
41	1	10.1038/s41467-018-05454-4	2018	14Jan2018	University of California, Los Angeles	USA	19.77	1.1204	1.1204	2.362	23.4791	75.2	1.989	0.9255	2.149	0.1006	sub cell (~0.1 cm^2)	stablized	NA	Newport Corporation	2017	ITO	SnO2	FA0.98Cs0.02PbI3/0.0167(PEA2PbI4)	(FA,Cs)PbI3	spin coating	Spiro-OMeTAD	Au or Ag	planar
42	1	10.1038/s41560-018-0219-8	2017	31Dec2017	University of Potsdam	Germany	19.415	1.14655	1.14655	22.325	22.0385	76.855	19.67	0.95835	20.525	1.013	cell ( ~1 cm^2)	average	NA	Fraunhofer Institute for Solar Energy Systems ISE	2017	ITO	C60	(FAPbI3)0.89(MAPbBr3)0.11	(FA,MA)Pb(I,Br)3	spin coating	PTAA	Cu	planar
43	1	10.1038/s41467-018-05760-x	2018	16Mar2018	Virginia Polytechnic Institute and State University	USA	21.52	1.1138	1.1138	2.502	24.4575	79	2.202	0.9499	2.318	0.1023	sub cell (~0.1 cm^2)	average	20	Newport Corporation	2018	ITO	SnO2	FA0.95Cs0.05Pbi3	(FA,Cs)PbI3	spin coating	Spiro-OMeTAD	Au	planar
44	1	10.1002/adma.201804028	2018	25Jun2018	Southern University of Science and Technology	China	19.5	1.12	1.12	2.48	25.7529	67.7	1.88	0.88	2.14	0.0963	sub cell (~0.1 cm^2)	forward	NA	National institute of metrology, China	2017	FTO	c-TiO2/mp-TiO2	FA0.85MA0.15PbI2.55Br0.45	(FA,MA)Pb(I,Br)3	spin coating	polythiophene	Au	mesoscopic
45	1	10.1016/j.electacta.2019.03.176	2019	04Jan2019	Wuhan University of Technology	China	16.5	7.65	1.09286	65.3	21.9971	68.65	343	5.9	58.2	20.78	submodule ( >10 cm^2)	average	100	National institute of metrology, China	2017	FTO	SnO2	FA0.85MA0.15Pb(I0.85Br0.15)3/5%K and Cs doping	(FA,MA,Cs)Pb(I,Br)3	spin coating	Spiro-OMeTAD	Au	planar
46	1	10.1038/s41467-019-08507-4	2018	16Aug2018	Beijing Institute of Technology	China	20.5	1.13	1.13	2.275	24.1815	75.45	1.93	0.93	2.08	0.09408	sub cell (~0.1 cm^2)	average	33	National institute of metrology, China	2018	ITO	SnO2	FA0.85MA0.15Pb(I0.85Br0.15)3	(FA,MA)Pb(I,Br)3	spin coating	Spiro-OMeTAD	Ag	planar
47	1	10.1038/s41566-019-0398-2	2018	28Aug2018	Institute of semicondutors, Chinese Academy of Sciences	China	23.32	1.1791	1.1791	1.865	25.2368	78.4	1.724	0.993	1.737	0.0739	sub cell (~0.1 cm^2)	stablized	NA	Newport Corporation	2018	ITO	SnO2	FA0.92MA0.08PbI3/PEAI	(FA,MA)PbI3	spin coating	Spiro-OMeTAD	Au	planar
48	1	10.1039/c8ee02284d	2018	03Aug2018	Shaanxi Normal University	China	16.6	1.08	1.08	1.88	20.7689	73.9	1.5	0.88	1.71	0.09052	sub cell (~0.1 cm^2)	forward	NA	National institute of metrology, China	2017	FTO	c-TiO2	MAPbI3	MAPbI3	spin coating	Spiro-OMeTAD	Au	planar
49	1	10.1002/adma.201905766	2019	04Sep2019	Nankai University	China	22.54	1.1625	1.1625	2.2016	24.7844	78.23	2.2021	0.98	2.043	0.08883	sub cell (~0.1 cm^2)	NA	NA	Quality supervision&Testing Center_x000D_ of Chemical&Physical Power Sources of Information Industry, China	2019	ITO	SnO2	FAxMAxPbI3	(FA,MA)PbI3	spin coating	Spiro-OMeTAD	Au	planar
50	1	10.1002/aenm.201902740	2019	22Aug2019	Ulsan National Institute of Science and Technology	South Korea	22.91	1.1411	1.1411	2.374	25.1217	79.9	2.164	0.967	2.239	0.0945	sub cell (~0.1 cm^2)	NA	NA	Newport Corporation	2019	FTO	c-TiO2	(FAPbI3)0.95(MAPbBr3)0.05/octylammonium iodide	(FA,MA)Pb(I,Br)3	spin coating	Spiro-OMeTAD	Au	planar
51	1	10.1002/solr.202000069	2020	04Feb2020	East China University of Science & Technology	China	20.7	1.1	1.1	1.605	23.0207	81.52	1.443	0.96	1.503	0.06972	sub cell (~0.1 cm^2)	reverse	33	National institute of metrology, China	2019	FTO	SnO2	FAPbI3/SF-PEA	FAPbI3	spin coating	Spiro-OMeTAD	Au	planar
52	1	10.1038/s41467-019-13909-5	2019	03Sep2019	City University of Hong Kong	China	15.6	1.145	1.145	1.172	17.4405	78	1.046	0.95	1.101	0.0672	sub cell (~0.1 cm^2)	reverse	33	National institute of metrology, China	2019	ITO	C60	CsPbBrxI3-x	CsPb(I,Br)3	spin coating	NiOx	Ag	Inverted planar
53	1	10.1038/s41560-019-0538-4	2019	13Sep2019	King Abdullah University of Science and Technology	Saudi Arabia	22.34	1.1429	1.1429	1.596	23.8565	82	1.496	0.985	1.518	0.0669	sub cell (~0.1 cm^2)	stablized	NA	Newport Corporation	2019	ITO	C60	Cs0.05(FA0.92MA0.08)0.95Pb(I0.92Br0.08)3	(FA,MA,Cs)Pb(I,Br)3	spin coating	PTAA	Cu	Inverted planar
54	1	10.1002/solr.201900263	2019	08Jun2019	Wuhan University of Technology	China	16.3	13.6	1.13	97.6	21.8345	66	874	10.3	85.6	53.64	submodule ( >10 cm^2)	average	50	National institute of metrology, China	2019	FTO	SnO2	K0.03Cs0.05(FA0.85MA0.15)0.92Pb(I0.85Br0.15)3	(FA,MA,Cs,K)Pb(I,Br)3	spin coating	Spiro-OMeTAD	Au	planar
55	1	10.1039/c9ee00751b	2019	05Mar2019	Massachusetts Institute of Technology	USA	22.56	1.1875	1.1875	2.301	24.2211	78.5	2.143	1.018	2.104	0.095	sub cell (~0.1 cm^2)	stablized	NA	Newport Corporation	2018	FTO	c-TiO2/mp-TiO2	(FAPbI3)0.92(MAPbBr3)0.08	(FA,MA)Pb(I,Br)3	spin coating	Spiro-OMeTAD	Au	planar
56	1	10.1126/sciadv.aax7537	2019	19Apr2019	University of North Carolina at Chapel Hill	USA	16.37	18.93	1.18312	72.96	18.3259	75.5	1043	15.356	67.9	63.7	submodule ( >10 cm^2)	NA	NA	National Renewable Energy Laboratory	2018	ITO	C60	MAPbI3	MAPbI3	blade coating	PTAA	Metal unspecified	Inverted planar
57	1	10.1016/j.isci.2019.10.021	2019	13May2019	Zhejiang University	China	20.17	1.13	1.13	1.99	23.2422	77.04	1.727	0.92	1.88	0.08562	sub cell (~0.1 cm^2)	reverse	NA	National institute of metrology, China	2018	ITO	SnO2	MAPbI3	MAPbI3	spin coating	Spiro-OMeTAD	Au	planar
58	1	10.1126/science.aav8680	2019	16May2019	Shanghai JiaoTong University	China	18.3	1.101	1.101	1.811	20.5259	81.1	1.616	0.95	1.702	0.08823	sub cell (~0.1 cm^2)	reverse	NA	National institute of metrology, China	2019	FTO	c-TiO2	CsPbI3	CsPbI3	spin coating	Spiro-OMeTAD	Ag	planar
59	1	10.1002/adma.201902543	2019	22Apr2019	The Chinese University of Hong Kong	China	20.24	1.15	1.15	1.98	23.1119	76.15	1.734	0.96	1.81	0.08567	sub cell (~0.1 cm^2)	NA	NA	National institute of metrology, China	2018	ITO	SnO2	MAPbI3	MAPbI3	spin coating	Spiro-OMeTAD	Au	planar
60	1	10.1002/adfm.201904856.	2019	17Jun2019	Southern University of Science and Technology	China	20.1	1.106	1.106	1.044	25.2174	72.2	0.833	0.88	0.947	0.0414	sub cell (~0.1 cm^2)	NA	NA	National institute of metrology, China	2019	FTO	c-TiO2/mp-TiO2	Cs0.05FA0.81MA0.14PbI2.55Br0.45	(FA,MA,Cs)Pb(I,Br)3	spin coating	polythiophene	Au	planar
61	1	10.1021/acsenergylett.9b02348	2019	27Oct2019	Sungkyunkwan University	South Korea	21.07	1.122	1.122	3.107	25.1783	74.6	2.601	0.925	2.811	0.1234	sub cell (~0.1 cm^2)	stablized	NA	Newport Corporation	2019	FTO	SnO2	FAPbI3	FAPbI3	spin coating	Spiro-OMeTAD	Ag	planar
62	1	10.1016/j.joule.2019.05.018	2019	16Jan2019	Korean Research Institute of Chemical Technology	South Korea	21.3	1.126	1.126	2.258	24.1497	78.3	1.991	0.959	2.0755	0.0935	sub cell (~0.1 cm^2)	average	150	Newport Corporation	2017	FTO	c-TiO2/mp-BaSnO3	(FAPbI3)0.93(MAPbBr3)0.07	(FA,MA)Pb(I,Br)3	spin coating	Spiro-OMeTAD	Au	mesoscopic
63	1	10.1016/j.joule.2019.06.014	2019	10Apr2019	Korea Institute of Energy Research	South Korea	23.48	1.145	1.145	2.053	25.6305	80.1	1.882	0.99	1.901	0.0801	sub cell (~0.1 cm^2)	average	20	Newport Corporation	2018	FTO	c-TiO2/mp-TiO2	FAPbI3/MACl	FAPbI3	spin coating	Spiro-OMeTAD	Au	mesoscopic
Abbreviations
NA	Not available
FTO	fluorine doped tin oxide
ITO	indium doped tin oxide
MA	methyl ammonium
FA	formamidinium
PEA	2-phenylethylammonium
c-TiO2	compact-TiO2(non-porous)
mp-TiO2	mesoporous-TiO2
Spiro-OMeTAD	2,2',7,7'-Tetrakis[N,N-di(4-methoxyphenyl)amino]-9,9'-spirobifluorene
PTAA	poly[bis(4-phenyl)(2,4,6-trimethylphenyl)amine
